# Supplementary material for: Common TDP1 Polymorphisms in Relation to Survival among Small Cell Lung Cancer Patients: A Multicenter Study from the International Lung Cancer Consortium
Source: Oxford University Press journal article supplement (doi:10.1158/1078-0432.ccr-17-1401), 2017-10-03
Supplement: 10780432ccr171401-sup-183378_2_supp_4287311_rwp0rr.xlsx [file 10780432ccr171401-sup-183378_2_supp_4287311_rwp0rr.xlsx]

## Sheet: Sheet1
Table S1. List of tag SNPs for the TDP1 gene region (+/- 2.5 kb of the coding sequence) on HapMap CEU population, generated by Genome Variation Server (http://gvs.gs.washington.edu)
Bin	Total Number of Sites	Average MAF	Tag SNPs	Other SNPs
1	20	0.02	rs1399742
			rs7145132
			rs7150748
			rs8016664
			rs8017752
			rs8020872
			rs11844949
			rs11846794
			rs11848062
			rs11849310
			rs11851399
			rs12879968
			rs17126508
			rs17126510
			rs17126513
			rs17126514
			rs17126522
			rs17126527
			rs17126535
			rs28365054
2	8	0.02	rs728286
			rs2277520
			rs3736860
			rs3783839
			rs7141376
			rs7149962
			rs10132460
			rs10143315
3	8	0.05	rs7150605	rs9488
			rs8015271	rs3825663
				rs8005676
				rs8010627
				rs10146347
				rs11851131
4	2	0.39	rs2401863
			rs11851266
5	2	0.05	rs4143999
			rs10498624
6	1	0.48	rs942190
7	1	0.08	rs1286927
8	1	0.04	rs11626288
9	1	0.03	rs12147923
10	1	0.05	rs12880397
Variation Color Code
splice or nonsense or frameshift
missense
coding-synonymous
coding
utr
Variation Font Code
not in a repeat region
in a repeat region
